# Supplementary material for: Two Cases of Focal Scrotal Vitiligo Successfully Treated by Autologous Cultured Melanocyte Transplantation
Source: Springer Nature journal article supplement (doi:10.1007/s13555-014-0050-5), 2014-03-26
Supplement: MOESM1 [file 9271024]

- Vitiligo has a deleterious effect on the psychosexual function of many individuals, and the genitalia is the common site for depigmentation.
- The authors report two cases of focal vitiligo affecting the scrotum of the genital organs which were treated successfully by autologous cultured melanocytes cell transplantation.
- Autologous cultured melanocytes transplantation on scrotum is shown to be a relatively effective method of treatment.

This summary slide represents the opinions of the authors. No funding or sponsorship was received for this study or publication of this article. For a full list of acknowledgments and conflicts of interest for all authors of this article, please see the full text online. Copyright © The Author(s) 2014. Creative Commons Attribution Noncommercial License (CC BY-NC).
